# Supplementary material
Source: PubMed Central journal article supplement (PMC3458221)

**Table 1** Primers sequences for real-time PCR analysis

| Gene           | Primers                          |
|----------------|----------------------------------|
| PPAR $\gamma$  | 5'- GTACTGTCGGTTTCAGAAGTGCC-3'   |
|                | 5'- ATCTCCGCCAACAGCTTCTCCT -3'   |
| C/EBP $\alpha$ | 5'- GCAAAGCCAAGAAGTCGGTGGA -3'   |
|                | 5'- CCTTCTGTTGCGTCTCCACGTT -3'   |
| GluT4          | 5'- GGTGTGGTCAATACGGTCTTCAC -3'  |
|                | 5'- AGCAGAGCCACGGTCATCAAGA -3'   |
| GluT5          | 5'- ATCGCTGCCTTTGGCTCATCCT -3'   |
|                | 5'- AGCAGCGTCAAGGTGAAGGACT -3'   |
| AP2            | 5'- TGAAATCACCGCAGACGACAGG -3'   |
|                | 5'- GCTTGTCACCATCTCGTTTTTCTC -3' |
| Adiponectin    | 5'- AGATGGCACTCCTGGAGAGAAG-3'    |
|                | 5'- ACATAAGCGGCTTCTCCAGGCT -3'   |
| actin          | 5'- CATTGCTGACAGGATGCAGAAGG -3'  |
|                | 5'- TGCTGGAAGGTGGACAGTGAGG -3'   |

**Fig 1. Effects of mannose, fructose and glucose on adipose differentiation in 3T3-L1 cells.** 3T3-L1 preadipocyte cells were differentiated under standard conditions as described in methods. During differentiation, the medium contained 11.1 mM glucose only (Ctrl), or 11.1 mM glucose with addition of 550  $\mu$ M mannose (Mannose), 550  $\mu$ M fructose (Fructose), or 550  $\mu$ M glucose (Glucose). RNA was extracted Oil-red O staining was performed after differentiated for 8 days. (A) (B) Oil-red O staining of 3T3-L1 cells differentiated in medium containing 11.1 mM glucose with addition of 550  $\mu$ M of different sugar (mannose, fructose and glucose). (C) Quantification by OD measurement at 540 nm for Oil red O staining of 3T3-L1 cells. (D) PPAR $\gamma$  and AP2 mRNA measured by real-time PCR in the 3T3-L1 cells following treatment with differentiation medium and 550  $\mu$ M mannose, fructose, or glucose. One-way ANOVA was carried out for statistic analysis. ns, not significant, \*  $p < 0.05$ ; \*\*  $p < 0.01$ .

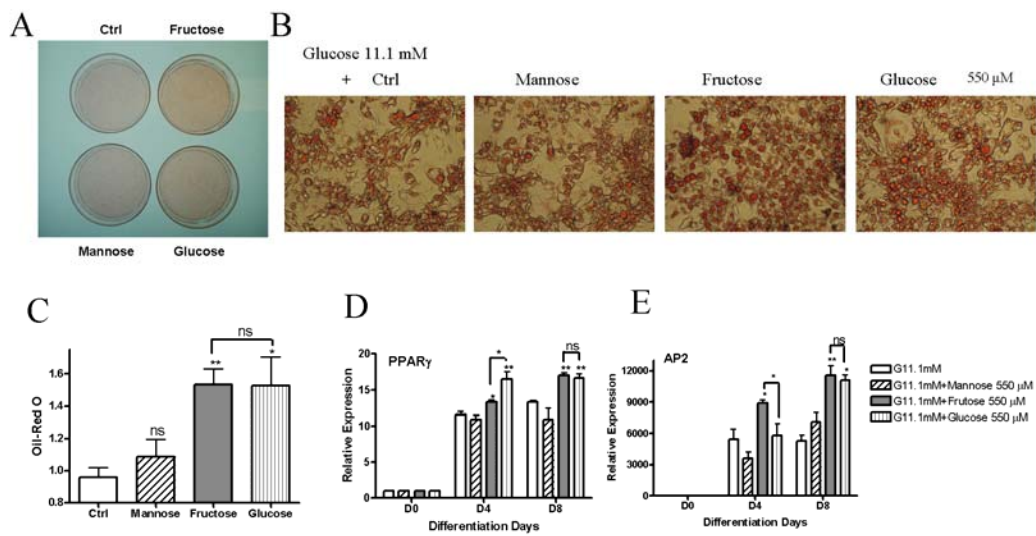

**Fig 2. GluT4 antibody specificity was validated by western with blocking peptide.** Each lane was loaded with 50µg 3T3-L1 cell lysate. The membrane was incubated with GluT4 antibody (1:500 diluted to final concentration 40 µg /ml) with no blocking peptide (lane 1) or with 80ug/ml blocking peptide (lane 2), then 2 pieces of membrane were incubated with secondary antibody together after 3 times wash with TBST. Immunoreactive proteins were visualized using SuperSignal Chemiluminescence Assay kit. GAPDH was served as loading control.

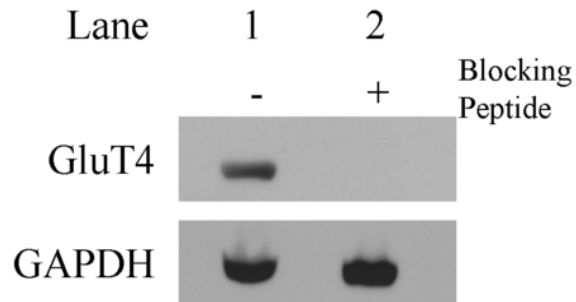

Supplement: supp_me.2012-1122_ME-12-1122_Supp.pdf [file supp_me.2012-1122_ME-12-1122_Supp.pdf]
